# Supplementary material for: Functional interactors of three genome-wide association study genes are differentially expressed in severe chronic obstructive pulmonary disease lung tissue
Source: PubMed Central journal article supplement (PMC5347019; doi:10.1038/srep44232), 2017-03-13
Supplement: srep44232-s1.pdf [file srep44232-s1.pdf]

Functional interactors of three genome-wide association study genes are  
differentially expressed in severe chronic obstructive pulmonary disease lung tissue

Jarrett D. Morrow<sup>1</sup>, Xiaobo Zhou<sup>1</sup>, Taotao Lao<sup>1</sup>, Zhiqiang Jiang<sup>1</sup>, Dawn L. DeMeo<sup>1,2</sup>, Michael H. Cho<sup>1,2</sup>,  
Weiliang Qiu<sup>1</sup>, Suzanne Cloonan<sup>3</sup>, Victor Pinto-Plata<sup>4</sup>, Bartholome Celli<sup>2</sup>, Nathaniel Marchetti<sup>5</sup>, Gerard J.  
Criner<sup>5</sup>, Raphael Bueno<sup>6</sup>, George R. Washko<sup>2</sup>, Kimberly Glass<sup>1</sup>, John Quackenbush<sup>7</sup>, Augustine M. K.  
Choi<sup>3</sup>, Edwin K. Silverman<sup>1,2</sup>, Craig P. Hersh<sup>1,2,#</sup>

1. Channing Division of Network Medicine, Brigham and Women's Hospital, Boston, MA
2. Division of Pulmonary and Critical Care Medicine, Brigham and Women's Hospital, Boston, MA
3. Department of Medicine, New York Presbyterian/Weill Cornell Medical Center, New York, NY
4. Department of Critical Care Medicine and Pulmonary Disease, Baystate Medical Center, Springfield, MA
5. Division of Pulmonary and Critical Care Medicine, Temple University, Philadelphia, PA
6. Division of Thoracic Surgery, Brigham and Women's Hospital, Boston, MA
7. Department of Biostatistics and Computational Biology, Dana-Farber Cancer Institute, Boston, MA

# Corresponding Author:

Craig P. Hersh

Channing Division of Network Medicine

Brigham and Women's Hospital

181 Longwood Avenue, Boston, MA 02115

Phone: 617-525-0729, Fax: 617-525-0958

[craig.hersh@channing.harvard.edu](mailto:craig.hersh@channing.harvard.edu)

S1 Table. Demographics of study subjects with expression data

| <b>Demographics</b>                                                                                                                                                                                 | <b>COPD cases<br/>n=111</b> | <b>Control smokers<br/>n=40</b> | <b>P-value</b> |
|-----------------------------------------------------------------------------------------------------------------------------------------------------------------------------------------------------|-----------------------------|---------------------------------|----------------|
| Age (years)                                                                                                                                                                                         | 63.3 (± 6.6)                | 65.7 (± 9.0)                    | 0.12           |
| Gender (female)                                                                                                                                                                                     | 59 (53.2%)                  | 25 (62.5%)                      | 0.36           |
| Race                                                                                                                                                                                                |                             |                                 | 0.91           |
| African American                                                                                                                                                                                    | 18 (16.2%)                  | 5 (12.5%)                       |                |
| White                                                                                                                                                                                               | 90 (81.1%)                  | 34 (85.0%)                      |                |
| Other                                                                                                                                                                                               | 3 (2.7%)                    | 1 (2.5%)                        |                |
| Current Smokers                                                                                                                                                                                     | 0%                          | 0%                              | NA             |
| Smoking History (pack-years)                                                                                                                                                                        | 61.3 (± 26.3)               | 33.6 (± 21.0)                   | <0.0001        |
| Time since quitting, months                                                                                                                                                                         | 81.1 (± 85.0)               | 187.1 (± 144.8)                 | <0.0001        |
| FEV1 % predicted                                                                                                                                                                                    | 26.5 (± 9.4)                | 98.7 (± 12.5)                   | <0.0001        |
| FEV1/FVC                                                                                                                                                                                            | 0.3 (± 0.1)                 | 0.8 (± 0.1)                     | <0.0001        |
| Body Mass Index                                                                                                                                                                                     | 25.6 (±4.6)                 | 28.2 (±5.8)                     | 0.02           |
| CT emphysema: Low attenuation areas at -950 HU (85 cases, 18 controls)                                                                                                                              | 34% (±14%)                  | 5% (±6%)                        | <0.0001        |
| CT emphysema: 15th percentile of the lung density histogram (85 cases, 18 controls)                                                                                                                 | -975 (±24.0)                | -910.2 (±35.1)                  | <0.0001        |
| SRWA-Pi10 (53 cases, 11 controls)                                                                                                                                                                   | 4.3 (±0.3)                  | 4.0 (±0.4)                      | 0.08           |
| Abbreviations: FEV1=forced expiratory volume in 1 sec; FVC= forced vital capacity; CT=computed tomography;<br>SRWA-Pi10=square root wall area of a hypothetical airway with 10mm internal perimeter |                             |                                 |                |

S3 Table: Overview of gene expression results

| <b>Phenotype variable predictor</b>                                                                                                                                                                                                   | <b>Significant probes<br/>(FDR&lt;0.05)</b> |
|---------------------------------------------------------------------------------------------------------------------------------------------------------------------------------------------------------------------------------------|---------------------------------------------|
| COPD                                                                                                                                                                                                                                  | 214                                         |
| FEV1 % predicted                                                                                                                                                                                                                      | 1,556                                       |
| FEV1 % predicted (cases only)                                                                                                                                                                                                         | 6                                           |
| FEV1/FVC                                                                                                                                                                                                                              | 1,689                                       |
| FEV1/FVC (cases only)                                                                                                                                                                                                                 | 57                                          |
| CT emphysema: Low attenuation areas at -950 HU                                                                                                                                                                                        | 143                                         |
| CT emphysema: 15th percentile of the lung density histogram                                                                                                                                                                           | 223                                         |
| SRWA-Pi10                                                                                                                                                                                                                             | 0                                           |
| <p>Abbreviations: FEV1=forced expiratory volume in 1 sec; FVC= forced vital capacity;<br/>           CT=computed tomography;<br/>           SRWA-Pi10=square root wall area of a hypothetical airway with 10mm internal perimeter</p> |                                             |

S4 Table. Top pathway enrichment results for the 214 probes (204 genes) associated with COPD (FDR<0.05)

| <b>GO description</b>                                        | <b>ID</b> | <b>Genes in Category</b> | <b>p value</b> | <b>FDR q value</b> |
|--------------------------------------------------------------|-----------|--------------------------|----------------|--------------------|
| cellular protein modification process                        | GO:6464   | 49                       | 1.13E-004      | 0.017              |
| apoptotic process                                            | GO:6915   | 34                       | 3.10E-005      | 0.012              |
| phosphorylation                                              | GO:16310  | 31                       | 1.58E-003      | 0.045              |
| regulation of apoptotic process                              | GO:42981  | 25                       | 7.07E-004      | 0.034              |
| regulation of protein modification process                   | GO:31399  | 24                       | 1.14E-003      | 0.041              |
| protein phosphorylation                                      | GO:6468   | 24                       | 4.39E-003      | 0.072              |
| peptidyl-amino acid modification                             | GO:18193  | 22                       | 3.41E-004      | 0.027              |
| regulation of phosphorylation                                | GO:42325  | 21                       | 6.29E-003      | 0.086              |
| generation of neurons                                        | GO:48699  | 21                       | 1.04E-002      | 0.097              |
| positive regulation of protein modification process          | GO:31401  | 20                       | 4.07E-004      | 0.028              |
| cytoplasmic transport                                        | GO:16482  | 19                       | 2.33E-003      | 0.05               |
| positive regulation of phosphate metabolic process           | GO:45937  | 18                       | 3.88E-003      | 0.066              |
| regulation of protein phosphorylation                        | GO:1932   | 18                       | 7.92E-003      | 0.091              |
| protein modification by small protein conjugation or removal | GO:70647  | 17                       | 1.44E-003      | 0.043              |
| positive regulation of phosphorylation                       | GO:42327  | 17                       | 2.52E-003      | 0.052              |
| intracellular protein transport                              | GO:6886   | 17                       | 8.17E-003      | 0.091              |
|                                                              |           |                          |                |                    |
| <b>Reactome category</b>                                     | <b>ID</b> | <b>Genes in Category</b> | <b>p value</b> | <b>FDR q value</b> |
| Regulation of actin dynamics for phagocytic cup formation    | 2029482   | 6                        | 6.72E-005      | 0.035              |
| Fcgamma receptor (FCGR) dependent phagocytosis               | 2029480   | 6                        | 3.91E-004      | 0.1                |

S5 Table. Lists of intersecting genes represented in the columns of S1 Figure.

| <b>Figure S1 column</b> | <b>Intersecting genes</b>                                                                                                                                                                                              |
|-------------------------|------------------------------------------------------------------------------------------------------------------------------------------------------------------------------------------------------------------------|
| 1                       | <i>CDC42, PSMC6, OAZ1, FBXO5, SENP6, EXOC8, YPEL5, UBQLN1, HTR2B, SERPINE2, GCC2, RAC1, SDCBP, SKP2, GOLGA7, UBASH3B, TAGLN2, FRZB, TMEM65, BMS1, PPIB, UQCRFS1, CXXC5, BPGM, EIF3F, NQO1, SELT, KIAA1279, ARFGAP3</i> |
| 2                       | <i>GYPE, TEX2, H3F3C, ABCA11P, DACHI, CARD16, MACC1, MRPL47, SYNE1, SMN2, ZCCHC10, HSP90AB4P, GTF2H2, PGGT1B, NNT</i>                                                                                                  |
| 3                       | <i>ERCC6, CLIC1, PPIA, SEPT6, CCL19, EMP2, RBMS1, PGAM4, S100A10, ARAP2</i>                                                                                                                                            |
| 4                       | <i>RBM33, PAQR8, CILP, CCT6P1, IRX6, CIT, ZNF101, PI4K2B</i>                                                                                                                                                           |
| 5                       | <i>POU2AF1, PLA2G7, RANBP9, DTX1</i>                                                                                                                                                                                   |
| 6                       | <i>XRCC4, PHKB, VEZT, PHF14</i>                                                                                                                                                                                        |
| 7                       | <i>TPM3</i>                                                                                                                                                                                                            |
| 8                       | <i>CAND2</i>                                                                                                                                                                                                           |
| 9                       | <i>ABL1, CD79A, FBXW7, FNTA, SPCS2, EEF1B2, VPS35, RPSA, HMGB1, P2RY14, PPP3CB</i>                                                                                                                                     |
| 10                      | <i>C6orf62, ADH5, SUMO2, C11orf58, VEGFA, SNRPG</i>                                                                                                                                                                    |
| 11                      | <i>BCL11A, CXCL12, E2F6, FCGR3A</i>                                                                                                                                                                                    |
| 12                      | <i>TM4SF19, DNTTIP2, HSPA5, HSPA13</i>                                                                                                                                                                                 |
| 13                      | <i>SYF2, ARPP19, BUB3, NUDT21</i>                                                                                                                                                                                      |
| 14                      | <i>KRT18, SLC45A2, SLC25A12</i>                                                                                                                                                                                        |
| 15                      | <i>MYO5B, PGK1</i>                                                                                                                                                                                                     |
| 16                      | <i>BCLAF1</i>                                                                                                                                                                                                          |
| 17                      | <i>LOC401397</i>                                                                                                                                                                                                       |
| 18                      | <i>AKAP2</i>                                                                                                                                                                                                           |
| 19                      | <i>PDPK1</i>                                                                                                                                                                                                           |
| 20                      | <i>KRT8</i>                                                                                                                                                                                                            |
| 21                      | <i>HSP90AA1, VDAC1</i>                                                                                                                                                                                                 |
| 22                      | <i>CXCR5</i>                                                                                                                                                                                                           |
| 23                      | <i>CLEC2D</i>                                                                                                                                                                                                          |

|    |                |
|----|----------------|
| 24 | <i>TOP1</i>    |
| 25 | <i>SOCS4</i>   |
| 26 | <i>EDN1</i>    |
| 27 | <i>DNAJB14</i> |
| 28 | <i>BCL2</i>    |
| 29 | <i>BLK</i>     |
| 30 | <i>SELM</i>    |
| 31 | <i>ADD3</i>    |
| 32 | <i>HNRNPA1</i> |
| 33 | <i>ELMO1</i>   |
| 34 | <i>LIMS1</i>   |
| 35 | <i>ARL4A</i>   |
| 36 | <i>CCBL2</i>   |

S6 Table. Summary of WGCNA modules (modules of interest highlighted)

| <b>Module name</b>                                                                                                           | <b>Minimum module self correlation</b> | <b>Mean module self correlation</b> | <b>SEM module self correlation</b> | <b>Module size</b> |
|------------------------------------------------------------------------------------------------------------------------------|----------------------------------------|-------------------------------------|------------------------------------|--------------------|
| black                                                                                                                        | 0.1739                                 | 0.6958                              | 0.0069                             | 911                |
| brown                                                                                                                        | 0.0080                                 | 0.6885                              | 0.0030                             | 4505               |
| red                                                                                                                          | 0.1767                                 | 0.7047                              | 0.0053                             | 1115               |
| greenyellow                                                                                                                  | 0.4013                                 | 0.6791                              | 0.0060                             | 273                |
| midnightblue                                                                                                                 | 0.5756                                 | 0.7880                              | 0.0090                             | 79                 |
| turquoise                                                                                                                    | 0.0110                                 | 0.5277                              | 0.0019                             | 5518               |
| yellow                                                                                                                       | 0.0261                                 | 0.5869                              | 0.0033                             | 2845               |
| lightcyan                                                                                                                    | 0.4093                                 | 0.7497                              | 0.0292                             | 30                 |
| pink                                                                                                                         | 0.2736                                 | 0.6214                              | 0.0055                             | 495                |
| salmon                                                                                                                       | 0.3093                                 | 0.7392                              | 0.0102                             | 131                |
| blue                                                                                                                         | 0.0336                                 | 0.5623                              | 0.0025                             | 4603               |
| purple                                                                                                                       | 0.3392                                 | 0.6841                              | 0.0051                             | 486                |
| cyan                                                                                                                         | 0.3967                                 | 0.7219                              | 0.0118                             | 90                 |
| magenta                                                                                                                      | 0.3144                                 | 0.6452                              | 0.0042                             | 495                |
| green                                                                                                                        | 0.0289                                 | 0.5358                              | 0.0034                             | 2543               |
| tan                                                                                                                          | 0.2853                                 | 0.6158                              | 0.0129                             | 197                |
| grey*                                                                                                                        | 0.0001                                 | 0.2152                              | 0.0017                             | 8515               |
| *grey module is a collection of probes with low correlation across all modules and is therefore not included in the analysis |                                        |                                     |                                    |                    |

S7 Table. Cyan module membership (putative hubs highlighted)

| Probe        | Gene Significance (q-value) | Module Membership (correlation with eigengene) | Gene symbol           | Differentially expressed (FDR<0.1) in mouse <i>Hhip</i> <sup>+/+</sup> vs. <i>Hhip</i> <sup>+/-</sup> 6 month smoke experiment <sup>32</sup> | Associated with regional emphysema severity in Campbell et al. study (FDR<0.1) <sup>10</sup> | Associated with emphysema vs. bronchiolitis in lung tissue in Faner et al. study <sup>44</sup> |
|--------------|-----------------------------|------------------------------------------------|-----------------------|----------------------------------------------------------------------------------------------------------------------------------------------|----------------------------------------------------------------------------------------------|------------------------------------------------------------------------------------------------|
| ILMN_1734878 | 0.0315                      | 0.9291                                         | <i>CD79A</i>          |                                                                                                                                              | Yes                                                                                          |                                                                                                |
| ILMN_1811049 | 0.0277                      | 0.9148                                         | <i>POU2AF1</i>        | Yes                                                                                                                                          |                                                                                              | Yes                                                                                            |
| ILMN_2401714 | 0.0177                      | 0.6307                                         | <i>MS4A1</i>          |                                                                                                                                              |                                                                                              | Yes                                                                                            |
| ILMN_1791329 | 0.0385                      | 0.7830                                         | <i>FCRL2</i>          |                                                                                                                                              |                                                                                              |                                                                                                |
| ILMN_1668277 | 0.0399                      | 0.8413                                         | <i>BLK</i>            | Yes                                                                                                                                          |                                                                                              |                                                                                                |
| ILMN_2342271 | 0.0399                      | 0.5205                                         | <i>BCL11A</i>         | Yes                                                                                                                                          | Yes                                                                                          |                                                                                                |
| ILMN_2337928 | 0.0499                      | 0.7747                                         | <i>CXCR5</i>          | Yes                                                                                                                                          |                                                                                              |                                                                                                |
| ILMN_1782704 | 0.0548                      | 0.8593                                         | <i>CD19</i>           | Yes                                                                                                                                          |                                                                                              |                                                                                                |
| ILMN_1873838 | 0.0677                      | 0.6375                                         | <i>IGKC</i>           |                                                                                                                                              |                                                                                              | Yes                                                                                            |
| ILMN_2369666 | 0.0860                      | 0.6814                                         | <i>CR2</i>            |                                                                                                                                              | Yes                                                                                          | Yes                                                                                            |
| ILMN_1708798 | 0.0943                      | 0.7488                                         | <i>EAF2</i>           | Yes                                                                                                                                          |                                                                                              |                                                                                                |
| ILMN_2414762 | 0.0951                      | 0.8305                                         | <i>TLR10</i>          |                                                                                                                                              |                                                                                              |                                                                                                |
| ILMN_1674228 | 0.1065                      | 0.7828                                         | <i>abparts*</i>       |                                                                                                                                              |                                                                                              |                                                                                                |
| ILMN_1691071 | 0.1163                      | 0.8791                                         | <i>FCRLA</i>          | Yes                                                                                                                                          | Yes                                                                                          |                                                                                                |
| ILMN_2393765 | 0.1164                      | 0.7392                                         | <i>IGLL1</i>          |                                                                                                                                              |                                                                                              |                                                                                                |
| ILMN_1719905 | 0.1182                      | 0.8361                                         | <i>TLR10</i>          |                                                                                                                                              |                                                                                              |                                                                                                |
| ILMN_2193233 | 0.1324                      | 0.8565                                         | <i>MZB1</i>           |                                                                                                                                              |                                                                                              | Yes                                                                                            |
| ILMN_1684445 | 0.1332                      | 0.7497                                         | <i>FCRL5</i>          |                                                                                                                                              |                                                                                              | Yes                                                                                            |
| ILMN_1804601 | 0.1342                      | 0.7993                                         | <i>DKFZp686O16217</i> |                                                                                                                                              |                                                                                              |                                                                                                |
| ILMN_1711988 | 0.1374                      | 0.3967                                         | <i>KCNK12</i>         |                                                                                                                                              |                                                                                              |                                                                                                |
| ILMN_1776939 | 0.1427                      | 0.6432                                         | <i>MS4A1</i>          |                                                                                                                                              |                                                                                              | Yes                                                                                            |
| ILMN_1699214 | 0.1559                      | 0.8390                                         | <i>abparts*</i>       |                                                                                                                                              |                                                                                              |                                                                                                |
| ILMN_1811238 | 0.1602                      | 0.4916                                         | <i>ALPK2</i>          |                                                                                                                                              |                                                                                              |                                                                                                |
| ILMN_1739508 | 0.1648                      | 0.8318                                         | <i>abparts*</i>       |                                                                                                                                              |                                                                                              |                                                                                                |
| ILMN_3240375 | 0.1665                      | 0.7672                                         | <i>abparts*</i>       |                                                                                                                                              |                                                                                              |                                                                                                |
| ILMN_1680274 | 0.1731                      | 0.7781                                         | <i>abparts*</i>       |                                                                                                                                              |                                                                                              |                                                                                                |
| ILMN_1700147 | 0.1778                      | 0.8365                                         | <i>VPREB3</i>         |                                                                                                                                              |                                                                                              |                                                                                                |
| ILMN_1759075 | 0.1821                      | 0.8549                                         | <i>TNFRSF13B</i>      |                                                                                                                                              |                                                                                              |                                                                                                |
| ILMN_1659227 | 0.1969                      | 0.9235                                         | <i>CD79A</i>          |                                                                                                                                              | Yes                                                                                          |                                                                                                |
| ILMN_1804339 | 0.1977                      | 0.8408                                         | <i>CAMK1G</i>         |                                                                                                                                              |                                                                                              |                                                                                                |
| ILMN_1707491 | 0.1977                      | 0.8470                                         | <i>FAM30A</i>         |                                                                                                                                              |                                                                                              |                                                                                                |
| ILMN_1768016 | 0.2123                      | 0.8708                                         | <i>TNFRSF17</i>       | Yes                                                                                                                                          |                                                                                              | Yes                                                                                            |



|              |        |        |                  |     |     |     |
|--------------|--------|--------|------------------|-----|-----|-----|
| ILMN_1785439 | 0.2326 | 0.7982 | <i>CD79B</i>     | Yes | Yes |     |
| ILMN_1711514 | 0.2503 | 0.6311 | <i>COCH</i>      |     |     |     |
| ILMN_1739726 | 0.2509 | 0.8058 | <i>JSRP1</i>     |     |     |     |
| ILMN_1688959 | 0.2555 | 0.8473 | <i>CD27</i>      | Yes |     | Yes |
| ILMN_1652199 | 0.2629 | 0.8368 | <i>abparts*</i>  |     |     |     |
| ILMN_2298366 | 0.2825 | 0.6390 | <i>TLR10</i>     |     |     |     |
| ILMN_2366212 | 0.2825 | 0.7715 | <i>CD79B</i>     | Yes | Yes |     |
| ILMN_1802100 | 0.2838 | 0.5599 | <i>ADAM28</i>    |     |     |     |
| ILMN_1679798 | 0.2899 | 0.6038 | <i>TLR9</i>      |     |     |     |
| ILMN_1731111 | 0.2922 | 0.5239 | <i>DERL3</i>     | Yes | Yes | Yes |
| ILMN_1700428 | 0.2939 | 0.7724 | <i>HLA-DOB</i>   | Yes |     |     |
| ILMN_1718552 | 0.2945 | 0.7078 | <i>CXCL13</i>    |     | Yes | Yes |
| ILMN_1676003 | 0.3196 | 0.8910 | <i>PNOC</i>      |     |     |     |
| ILMN_3247998 | 0.3205 | 0.7472 | <i>STAP1</i>     |     |     |     |
| ILMN_1664631 | 0.3256 | 0.6002 | <i>ADAM28</i>    |     |     |     |
| ILMN_2105441 | 0.3267 | 0.7638 | <i>IGJ</i>       |     |     | Yes |
| ILMN_1731742 | 0.3314 | 0.7403 | <i>TNFRSF13C</i> | Yes |     |     |
| ILMN_1707448 | 0.3360 | 0.8136 | <i>CDK12</i>     |     |     |     |
| ILMN_2073202 | 0.3447 | 0.6831 | <i>MEI1</i>      |     |     |     |
| ILMN_2099528 | 0.3458 | 0.7638 | <i>BTLA</i>      | Yes |     |     |
| ILMN_2214355 | 0.3554 | 0.6887 | <i>RAB30</i>     |     |     |     |
| ILMN_1684724 | 0.3570 | 0.6742 | <i>CR2</i>       |     | Yes | Yes |
| ILMN_1759312 | 0.3580 | 0.7688 | <i>AMPD1</i>     |     | Yes |     |
| ILMN_2403965 | 0.3681 | 0.7066 | <i>TXNDC5</i>    |     |     |     |
| ILMN_1695891 | 0.3703 | 0.7158 | <i>abparts*</i>  |     |     |     |
| ILMN_1659800 | 0.3773 | 0.5470 | <i>BCL11A</i>    | Yes | Yes |     |
| ILMN_1748283 | 0.3892 | 0.8224 | <i>PIM2</i>      |     |     | Yes |
| ILMN_1749502 | 0.3976 | 0.7694 | <i>ZNF215</i>    |     |     |     |
| ILMN_1713759 | 0.4292 | 0.6289 | <i>UBE2J1</i>    |     |     |     |
| ILMN_1743797 | 0.4304 | 0.7236 | <i>abparts*</i>  |     |     |     |
| ILMN_1777971 | 0.4697 | 0.6619 | <i>RNF126P1</i>  |     |     |     |
| ILMN_1810254 | 0.4849 | 0.8117 | <i>MEI1</i>      |     |     |     |
| ILMN_1769782 | 0.5019 | 0.6764 | <i>LAX1</i>      | Yes |     |     |
| ILMN_1710017 | 0.5397 | 0.7897 | <i>CD79B</i>     | Yes | Yes |     |
| ILMN_1787345 | 0.5512 | 0.8560 | <i>FKBP11</i>    |     |     |     |
| ILMN_1729198 | 0.5564 | 0.6374 | <i>abparts*</i>  |     |     |     |
| ILMN_1810374 | 0.5610 | 0.7745 | <i>TMEM156</i>   |     |     |     |
| ILMN_2206722 | 0.5752 | 0.6824 | <i>FER1L4</i>    |     |     |     |
| ILMN_1653579 | 0.5768 | 0.6445 | <i>abparts*</i>  |     |     |     |

|                                                  |        |        |                 |     |     |     |
|--------------------------------------------------|--------|--------|-----------------|-----|-----|-----|
| ILMN_3212395                                     | 0.5815 | 0.7890 | <i>IGH</i>      |     |     |     |
| ILMN_1678859                                     | 0.6029 | 0.6176 | <i>abparts*</i> |     |     |     |
| ILMN_1788108                                     | 0.6268 | 0.7740 | <i>TXNDC5</i>   |     |     |     |
| ILMN_1658426                                     | 0.6273 | 0.6915 | <i>WNT10A</i>   |     |     |     |
| ILMN_3187535                                     | 0.6498 | 0.6201 | <i>FAM30A</i>   |     |     |     |
| ILMN_3247797                                     | 0.6510 | 0.6073 | <i>abparts*</i> |     |     |     |
| ILMN_1813703                                     | 0.6541 | 0.6466 | <i>RALGPS2</i>  | Yes | Yes |     |
| ILMN_1681301                                     | 0.6624 | 0.6719 | <i>AIM2</i>     |     |     | Yes |
| ILMN_1806754                                     | 0.6906 | 0.5530 | <i>GLDC</i>     | Yes |     |     |
| ILMN_1749362                                     | 0.7112 | 0.5387 | <i>CD28</i>     |     |     |     |
| ILMN_1769082                                     | 0.7143 | 0.6205 | <i>TXNDC5</i>   |     |     |     |
| ILMN_3307791                                     | 0.7247 | 0.5610 | <i>FAM69A</i>   |     |     |     |
| ILMN_1696705                                     | 0.7905 | 0.5272 | <NA>            |     |     |     |
| ILMN_2233783                                     | 0.8128 | 0.7426 | <i>CD38</i>     |     |     | Yes |
| ILMN_1799669                                     | 0.8213 | 0.6883 | <i>PSORS1C1</i> |     |     |     |
| ILMN_1651415                                     | 0.8222 | 0.7224 | <i>DERL3</i>    | Yes | Yes | Yes |
| ILMN_1652366                                     | 0.8955 | 0.5934 | <i>NLRP7</i>    |     |     |     |
| ILMN_3243573                                     | 0.9788 | 0.5583 | <i>abparts*</i> |     |     |     |
| ILMN_1713266                                     | 0.9847 | 0.6553 | <i>FAM46C</i>   |     |     |     |
| *probe mapping to hypervariable antibody regions |        |        |                 |     |     |     |

S8 Table. Top 109 Brown module members with nominal Gene Significance (p-value<0.05) sorted by driver metrics (putative driver highlighted).

| <b>Probe</b> | <b>Gene Significance (p-value)</b> | <b>Module Membership</b> | <b>Gene symbol</b>     |
|--------------|------------------------------------|--------------------------|------------------------|
| ILMN_1676938 | 1.77E-005                          | 0.8357                   | <i>HMGB1</i>           |
| ILMN_3187508 | 2.79E-005                          | 0.5224                   | <i>FLJ40504</i>        |
| ILMN_2050921 | 3.46E-005                          | 0.8691                   | <i>C3orf78 (SMIM4)</i> |
| ILMN_2398474 | 0.0001734                          | 0.8756                   | <i>RAP1B</i>           |
| ILMN_3245015 | 0.0002088                          | 0.8362                   | <i>LOC440563</i>       |
| ILMN_1665333 | 0.0003569                          | 0.5896                   | <i>SUMO2</i>           |
| ILMN_1705330 | 0.000404                           | 0.8291                   | <i>CDC42</i>           |
| ILMN_1656898 | 0.0005366                          | 0.8440                   | <i>PTCD1</i>           |
| ILMN_3266294 | 0.0006049                          | 0.6486                   | <i>SREK1IP1</i>        |
| ILMN_1696031 | 0.000622                           | 0.7596                   | <i>C15orf21</i>        |
| ILMN_1691485 | 0.000622                           | 0.9047                   | <i>GTF2H2</i>          |
| ILMN_3191922 | 0.0006237                          | 0.7170                   | <i>FLJ46111</i>        |
| ILMN_2068122 | 0.0008625                          | 0.8763                   | <i>TMEM65</i>          |
| ILMN_3239871 | 0.001072                           | 0.8138                   | <i>ARPP19</i>          |
| ILMN_3219808 | 0.001072                           | 0.8429                   | <i>HNRNPA1</i>         |
| ILMN_3183789 | 0.001467                           | 0.5417                   | <i>UQCRFS1</i>         |
| ILMN_1799837 | 0.001945                           | 0.8195                   | <i>POTEM</i>           |
| ILMN_2141398 | 0.002241                           | 0.7662                   | <i>VEZT</i>            |
| ILMN_2133146 | 0.002241                           | 0.9234                   | <i>NUDT21</i>          |
| ILMN_1680887 | 0.002531                           | 0.6139                   | <i>CLIC1</i>           |
| ILMN_3251365 | 0.002555                           | 0.8500                   | <i>PGGT1B</i>          |
| ILMN_1711053 | 0.002555                           | 0.6945                   | <i>BBS5</i>            |
| ILMN_1695872 | 0.002555                           | 0.9327                   | <i>CDC42</i>           |
| ILMN_3284222 | 0.002596                           | 0.9094                   | <i>EMP2</i>            |
| ILMN_2168866 | 0.002836                           | 0.8063                   | <i>C6orf62</i>         |
| ILMN_3178307 | 0.002836                           | 0.7763                   | <i>KRT18</i>           |
| ILMN_1681160 | 0.003019                           | 0.9066                   | <i>CCT6P1</i>          |
| ILMN_3201895 | 0.003288                           | 0.8183                   | <i>TAF9</i>            |
| ILMN_2102515 | 0.003633                           | 0.6678                   | <i>PGAM4</i>           |

|              |          |        |                  |
|--------------|----------|--------|------------------|
| ILMN_1718001 | 0.003677 | 0.7394 | <i>PHKB</i>      |
| ILMN_1709360 | 0.004273 | 0.7581 | <i>ARAP2</i>     |
| ILMN_1783303 | 0.005206 | 0.8818 | <i>HSP90AB4P</i> |
| ILMN_1652209 | 0.005421 | 0.9106 | <i>BMS1</i>      |
| ILMN_1762808 | 0.005421 | 0.9438 | <i>RAC1</i>      |
| ILMN_2372773 | 0.005617 | 0.7647 | <i>TANK</i>      |
| ILMN_1766753 | 0.006712 | 0.9335 | <i>RBMS1</i>     |
| ILMN_2167709 | 0.007051 | 0.6860 | <i>NIPSNAP3A</i> |
| ILMN_2407605 | 0.007418 | 0.6921 | <i>SLX1A</i>     |
| ILMN_3246845 | 0.007747 | 0.6926 | <i>VPS35</i>     |
| ILMN_3195815 | 0.008009 | 0.9020 | <i>HMGB1</i>     |
| ILMN_1812163 | 0.009411 | 0.5508 | <i>GYPE</i>      |
| ILMN_2245180 | 0.009411 | 0.7795 | <i>BUB3</i>      |
| ILMN_2211583 | 0.009411 | 0.9642 | <i>KIAA1279</i>  |
| ILMN_1842286 | 0.009411 | 0.9159 | <i>AV740359</i>  |
| ILMN_3188174 | 0.009499 | 0.8307 | <i>CLEC2D</i>    |
| ILMN_2130003 | 0.009499 | 0.9054 | <i>CCBL2</i>     |
| ILMN_3256445 | 0.0105   | 0.8845 | <i>SNRPG</i>     |
| ILMN_2147471 | 0.0105   | 0.9561 | <i>PI4K2B</i>    |
| ILMN_2399571 | 0.0105   | 0.9453 | <i>CBY1</i>      |
| ILMN_1654043 | 0.0105   | 0.7842 | <i>NBEAL1</i>    |
| ILMN_3249435 | 0.0105   | 0.8262 | <i>UBASH3B</i>   |
| ILMN_1764163 | 0.01142  | 0.9275 | <i>TPM3</i>      |
| ILMN_3302139 | 0.01177  | 0.9093 | <i>C15orf21</i>  |
| ILMN_1703622 | 0.01177  | 0.9346 | <i>PPIB</i>      |
| ILMN_1757084 | 0.01177  | 0.9344 | <i>ADH5</i>      |
| ILMN_2352926 | 0.01248  | 0.8199 | <i>BPGM</i>      |
| ILMN_1813131 | 0.01282  | 0.8502 | <i>KRT8</i>      |
| ILMN_2096759 | 0.01289  | 0.9551 | <i>PSMC6</i>     |
| ILMN_3201975 | 0.01333  | 0.9750 | <i>PPIA</i>      |
| ILMN_1759396 | 0.0136   | 0.8968 | <i>NNT</i>       |
| ILMN_1791933 | 0.01388  | 0.7863 | <i>CCDC82</i>    |
| ILMN_2237474 | 0.01507  | 0.7548 | <i>TBC1D8B</i>   |
| ILMN_2116811 | 0.01507  | 0.8778 | <i>C7orf70</i>   |

|              |         |        |           |
|--------------|---------|--------|-----------|
| ILMN_1654195 | 0.01585 | 0.7779 | GCC2      |
| ILMN_2086952 | 0.01619 | 0.8338 | TOP1      |
| ILMN_2354953 | 0.01669 | 0.7680 | NQO1      |
| ILMN_2184262 | 0.0173  | 0.7930 | OAS3      |
| ILMN_2099798 | 0.01759 | 0.9535 | LYPLA1    |
| ILMN_3252936 | 0.01771 | 0.8724 | KRT18     |
| ILMN_2141157 | 0.01771 | 0.9398 | RANBP9    |
| ILMN_2213680 | 0.02059 | 0.8022 | ZCCHC10   |
| ILMN_2294762 | 0.02059 | 0.8736 | AMY1A     |
| ILMN_1800575 | 0.02171 | 0.7692 | LIMS1     |
| ILMN_1764036 | 0.02178 | 0.9015 | P2RY14    |
| ILMN_1734149 | 0.02425 | 0.8498 | RPSAP52   |
| ILMN_2386053 | 0.02562 | 0.8564 | DACH1     |
| ILMN_1757011 | 0.02699 | 0.8491 | LY75      |
| ILMN_2287296 | 0.02767 | 0.8386 | SYF2      |
| ILMN_1811029 | 0.02767 | 0.8218 | TLK1      |
| ILMN_3249064 | 0.02795 | 0.7918 | LOC653545 |
| ILMN_1807945 | 0.02827 | 0.9598 | ANP32A    |
| ILMN_1773174 | 0.02884 | 0.8074 | PDPK1     |
| ILMN_2118910 | 0.02987 | 0.9545 | TPRKB     |
| ILMN_2188959 | 0.02996 | 0.8325 | ACOT2     |
| ILMN_1871688 | 0.03172 | 0.7759 | AK093898  |
| ILMN_1687036 | 0.03207 | 0.9712 | MRPL47    |
| ILMN_3200430 | 0.03323 | 0.8377 | GOLGA7    |
| ILMN_3258027 | 0.03426 | 0.9560 | LOC401397 |
| ILMN_3291921 | 0.03505 | 0.9366 | C11orf58  |
| ILMN_2413264 | 0.03556 | 0.9129 | SOCS4     |
| ILMN_2379695 | 0.03675 | 0.8581 | XRCC4     |
| ILMN_1753663 | 0.03702 | 0.9256 | ARL4A     |
| ILMN_2264916 | 0.03739 | 0.8382 | EDNRB     |
| ILMN_3205924 | 0.03853 | 0.9396 | EIF3F     |
| ILMN_2057389 | 0.03853 | 0.9189 | PEX3      |
| ILMN_2054236 | 0.03853 | 0.9303 | SENP6     |
| ILMN_1777301 | 0.03853 | 0.8017 | ARL13B    |

|              |         |        |         |
|--------------|---------|--------|---------|
| ILMN_3305993 | 0.03994 | 0.9362 | OAZ1    |
| ILMN_1762330 | 0.03994 | 0.8561 | C1D     |
| ILMN_2227368 | 0.03994 | 0.9364 | SELT    |
| ILMN_2083818 | 0.04012 | 0.9581 | EXOC8   |
| ILMN_2393060 | 0.04152 | 0.8528 | PPIL3   |
| ILMN_3191030 | 0.0418  | 0.9276 | SDCBP   |
| ILMN_3230286 | 0.04188 | 0.9406 | BCLAF1  |
| ILMN_3201658 | 0.04219 | 0.8176 | VDAC1   |
| ILMN_1708345 | 0.04383 | 0.9503 | DNTTIP2 |
| ILMN_2121189 | 0.0458  | 0.8426 | METTL18 |
| ILMN_3252556 | 0.04645 | 0.9199 | CARD16  |
| ILMN_2401770 | 0.04655 | 0.8887 | PHF14   |

S9 Table. Pathway enrichment results for cyan module.

| <b>GO description</b>                                                              | <b>ID</b> | <b>genes in category</b> | <b>p value</b> | <b>FDR q value</b> |
|------------------------------------------------------------------------------------|-----------|--------------------------|----------------|--------------------|
| immune response-regulating cell surface receptor signaling pathway                 | 2768      | 12                       | 3.33E-010      | 7.89E-008          |
| B cell proliferation                                                               | 42100     | 8                        | 1.33E-010      | 6.30E-008          |
| antigen receptor-mediated signaling pathway                                        | 50851     | 8                        | 9.25E-009      | 1.10E-006          |
| regulation of B cell activation                                                    | 50864     | 7                        | 1.44E-008      | 1.37E-006          |
| B cell receptor signaling pathway                                                  | 50853     | 6                        | 1.64E-009      | 2.59E-007          |
| regulation of lymphocyte proliferation                                             | 50670     | 6                        | 1.20E-005      | 7.34E-004          |
| regulation of mononuclear cell proliferation                                       | 32944     | 6                        | 1.24E-005      | 7.34E-004          |
| T cell aggregation                                                                 | 70489     | 6                        | 1.19E-003      | 2.89E-002          |
| lymphocyte aggregation                                                             | 71593     | 6                        | 1.22E-003      | 2.89E-002          |
| leukocyte aggregation                                                              | 70486     | 6                        | 1.31E-003      | 2.96E-002          |
| leukocyte differentiation                                                          | 2521      | 6                        | 1.61E-003      | 3.46E-002          |
| regulation of B cell proliferation                                                 | 30888     | 5                        | 5.47E-007      | 4.32E-005          |
| immunoglobulin mediated immune response                                            | 16064     | 5                        | 2.49E-005      | 1.31E-003          |
| B cell mediated immunity                                                           | 19724     | 5                        | 2.81E-005      | 1.33E-003          |
| regulation of protein secretion                                                    | 50708     | 5                        | 3.22E-003      | 4.92E-002          |
| positive regulation of B cell activation                                           | 50871     | 4                        | 3.21E-005      | 1.38E-003          |
| B cell differentiation                                                             | 30183     | 4                        | 2.51E-004      | 9.91E-003          |
| regulation of calcium ion transport                                                | 51924     | 4                        | 2.13E-003      | 4.21E-002          |
|                                                                                    |           |                          |                |                    |
| <b>Reactome category</b>                                                           | <b>ID</b> | <b>genes in category</b> | <b>p value</b> | <b>FDR q value</b> |
| Immune System                                                                      | 168256    | 10                       | 1.02E-005      | 4.84E-004          |
| Adaptive Immune System                                                             | 1280218   | 7                        | 3.07E-005      | 9.72E-004          |
| Signaling by the B Cell Receptor (BCR)                                             | 983705    | 5                        | 5.57E-005      | 1.32E-003          |
| Innate Immune System                                                               | 168249    | 5                        | 8.49E-003      | 7.55E-002          |
| Antigen activates B Cell Receptor (BCR) leading to generation of second messengers | 983695    | 4                        | 7.15E-007      | 6.79E-005          |
| Peptide ligand-binding receptors                                                   | 375276    | 3                        | 9.53E-003      | 7.55E-002          |
| G alpha (i) signalling events                                                      | 418594    | 3                        | 1.13E-002      | 8.22E-002          |

S10 Table. Pathway enrichment results for brown module.

| <b>GO description</b>                                       | <b>ID</b> | <b>genes in category</b> | <b>p value</b> | <b>FDR q value</b> |
|-------------------------------------------------------------|-----------|--------------------------|----------------|--------------------|
| RNA biosynthetic process                                    | 32774     | 772                      | 2.97E-028      | 1.50E-025          |
| regulation of cellular macromolecule biosynthetic process   | 2000112   | 750                      | 5.33E-021      | 1.35E-018          |
| nucleic acid-templated transcription                        | 97659     | 705                      | 2.22E-018      | 5.04E-016          |
| transcription, DNA-templated                                | 6351      | 701                      | 2.72E-018      | 5.88E-016          |
| regulation of RNA biosynthetic process                      | 2001141   | 687                      | 1.72E-017      | 3.12E-015          |
| regulation of nucleic acid-templated transcription          | 1903506   | 686                      | 6.09E-018      | 1.26E-015          |
| regulation of transcription, DNA-templated                  | 6355      | 680                      | 1.33E-017      | 2.62E-015          |
| cellular protein modification process                       | 6464      | 651                      | 8.94E-020      | 2.14E-017          |
| transcription from RNA polymerase II promoter               | 6366      | 357                      | 6.62E-009      | 6.52E-007          |
| phosphorylation                                             | 16310     | 357                      | 1.35E-005      | 6.76E-004          |
| apoptotic process                                           | 6915      | 348                      | 5.97E-008      | 5.43E-006          |
| regulation of transcription from RNA polymerase II promoter | 6357      | 320                      | 1.11E-006      | 7.01E-005          |
| protein phosphorylation                                     | 6468      | 278                      | 1.91E-005      | 9.15E-004          |
| regulation of protein modification process                  | 31399     | 270                      | 5.03E-008      | 4.67E-006          |
| cytoplasmic transport                                       | 16482     | 269                      | 2.95E-023      | 9.57E-021          |
| regulation of apoptotic process                             | 42981     | 269                      | 7.03E-007      | 4.90E-005          |
| regulation of phosphate metabolic process                   | 19220     | 266                      | 7.25E-004      | 1.84E-002          |
| positive regulation of RNA biosynthetic process             | 1902680   | 254                      | 5.93E-007      | 4.28E-005          |
| positive regulation of transcription, DNA-templated         | 45893     | 249                      | 5.81E-007      | 4.26E-005          |
| positive regulation of nucleic acid-templated transcription | 1903508   | 249                      | 5.81E-007      | 4.26E-005          |
|                                                             |           |                          |                |                    |
| <b>Reactome category</b>                                    | <b>ID</b> | <b>genes in category</b> | <b>p value</b> | <b>FDR q value</b> |
| Metabolism                                                  | 1430728   | 270                      | 2.75E-009      | 1.23E-007          |
| Gene Expression                                             | 74160     | 253                      | 8.07E-040      | 1.09E-036          |
| Metabolism of proteins                                      | 392499    | 194                      | 3.25E-030      | 2.19E-028          |
| Immune System                                               | 168256    | 193                      | 2.96E-010      | 1.38E-008          |
| Disease                                                     | 1643685   | 183                      | 2.27E-023      | 1.39E-021          |
| Infectious disease                                          | 5663205   | 124                      | 3.28E-025      | 2.11E-023          |
| Cell Cycle                                                  | 1640170   | 124                      | 8.93E-013      | 4.46E-011          |
| Innate Immune System                                        | 168249    | 108                      | 1.05E-004      | 1.77E-003          |
| Cell Cycle, Mitotic                                         | 69278     | 105                      | 7.93E-012      | 3.82E-010          |
| Adaptive Immune System                                      | 1280218   | 88                       | 4.29E-005      | 8.76E-004          |
| Metabolism of lipids and lipoproteins                       | 556833    | 86                       | 1.20E-002      | 6.57E-002          |



|                                                                   |        |    |           |           |
|-------------------------------------------------------------------|--------|----|-----------|-----------|
| Translation                                                       | 72766  | 85 | 1.19E-037 | 2.30E-035 |
| Signaling by Rho GTPases                                          | 194315 | 81 | 3.45E-007 | 1.33E-005 |
| Hemostasis                                                        | 109582 | 79 | 6.91E-003 | 4.47E-002 |
| Cap-dependent Translation Initiation                              | 72737  | 75 | 7.93E-038 | 1.78E-035 |
| Eukaryotic Translation Initiation                                 | 72613  | 75 | 7.93E-038 | 1.78E-035 |
| 3' -UTR-mediated translational regulation                         | 157279 | 73 | 7.67E-039 | 3.44E-036 |
| L13a-mediated translational silencing of Ceruloplasmin expression | 156827 | 73 | 7.67E-039 | 3.44E-036 |
| GTP hydrolysis and joining of the 60S ribosomal subunit           | 72706  | 73 | 2.03E-038 | 6.84E-036 |

S11 Table. Regression models for association with outcomes of interest

| <b>Model #</b>                                                                                                                                                                                                                   | <b>Variable of interest</b>                                 | <b>Model</b>                                                                    |
|----------------------------------------------------------------------------------------------------------------------------------------------------------------------------------------------------------------------------------|-------------------------------------------------------------|---------------------------------------------------------------------------------|
| 1                                                                                                                                                                                                                                | COPD                                                        | EXP ~ <b>COPD</b> + age + sex + race + pack-years + surrogate_variables         |
| 2                                                                                                                                                                                                                                | FEV1 % predicted                                            | EXP ~ <b>FEV1.PP</b> + age + sex + race + pack-years + surrogate_variables      |
| 3                                                                                                                                                                                                                                | FEV1/FVC                                                    | EXP ~ <b>FEV1FVC</b> + age + sex + race + pack-years + surrogate_variables      |
| 4                                                                                                                                                                                                                                | CT emphysema: Low attenuation areas at -950 HU              | EXP ~ <b>LAA950</b> + age + sex + race + BMI + pack-years + surrogate_variables |
| 5                                                                                                                                                                                                                                | CT emphysema: 15th percentile of the lung density histogram | EXP ~ <b>perc15</b> + age + sex + race + BMI + pack-years + surrogate_variables |
| 6                                                                                                                                                                                                                                | SRWA-Pi10                                                   | EXP ~ <b>Pi10</b> + age + sex + race + pack-years + surrogate_variables         |
| <p>Abbreviations: FEV1=forced expiratory volume in 1 sec; FVC= forced vital capacity; CT=computed tomography; SRWA-Pi10=square root wall area of a hypothetical airway with 10mm internal perimeter, EXP = expression values</p> |                                                             |                                                                                 |

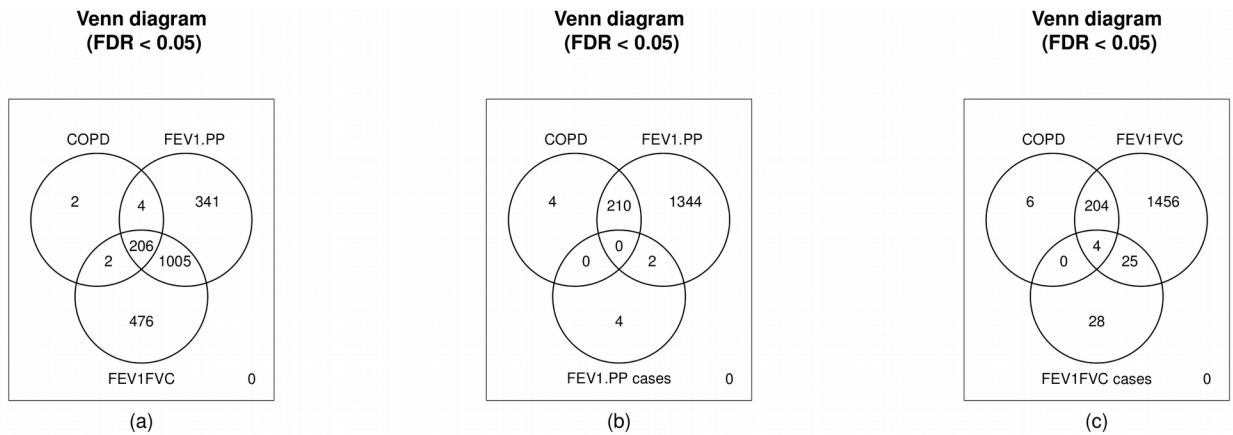

S1 Figure. Venn diagrams of the overlap between the significant differential expression results: (a) case-control, FEV<sub>1</sub> %predicted and FEV<sub>1</sub>/FVC ratio significant probes, (b) case-control, FEV<sub>1</sub> %predicted and FEV<sub>1</sub> %predicted (cases only), (c) case-control, FEV<sub>1</sub>/FVC ratio and FEV<sub>1</sub>/FVC ratio (cases only)

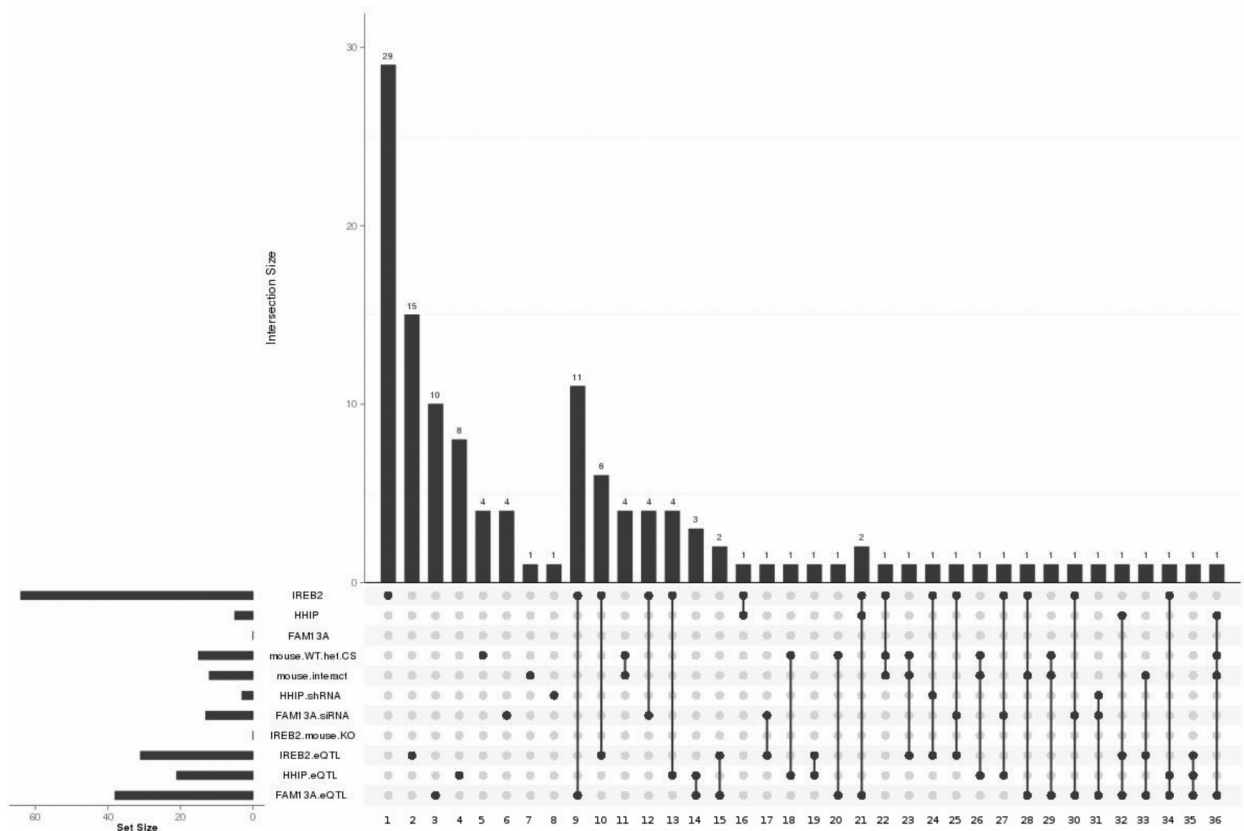

S2 Figure. Plot showing the intersection of overlap sets from the interactor enrichment tests for COPD differentially expressed genes. Each column in the plot provides Venn diagram type intersection content<sup>41</sup> (Supplemental Figure S3). Horizontal bars (Set Size) represent the size of overlap with the 204 COPD genes. Single solid dots represent genes that do not intersect with any other overlap set, and the solid dots connected by lines represent intersections. The vertical bars (Intersection Size) are proportional to the total number of genes for the solid dot(s) below them. For any given overlap set (any row), the total overlap count from Table 3 may be recapitulated by summing across all columns containing a solid dot. For example, the IREB2 enrichment overlap of 64 is found by summing columns 1, 9, 10, 12, 13, 16, 21, 22, 24, 25, 27, 28, 30, 34. The genes contained in each column count (value at top of bar) are listed in Table S8.

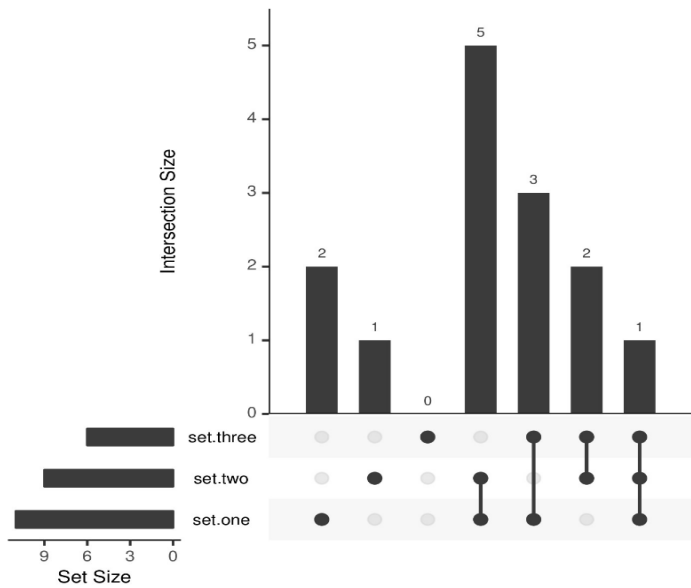

(a)

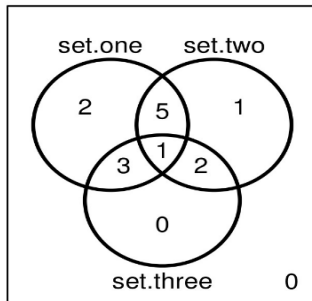

(b)

S3 Figure. A three-set example using hypothetical data to compare the presentations of intersections (a) UpSet plot and (b) equivalent Venn diagram. The complexity of presentation grows more quickly for a Venn diagram as the number of sets increases.
